# Supplementary material for: Acceptance of Electronic Labeling for Medicinal Product Information Among Malaysian Hospital Patients: Cross-Sectional Study
Source: PubMed Central journal article supplement (PMC11447418; doi:10.2196/56591), 2024-09-18
Supplement: jmir_v26i1e56591_app1.pdf [file jmir_v26i1e56591_app1.pdf]

## Multimedia Appendix 1

### Questionnaire: Acceptance to e-labelling among Hospital Ambulatory patients (English)

#### Section A: Demographic characteristics and use of pharmaceutical products package insert

1. Age: \_\_

2. Gender

- Male
- Female

3. Ethnicity

- Malay
- Chinese
- Indian
- Others

4. Highest level of education

- University/ College
- Secondary School
- Primary School
- No formal schooling

5. Do you ever obtain or seek written information about your medicine?

- Yes
- No **(SKIP TO SECTION B)**

6. What is your most common source of written information about medicine?

- Medicinal product package insert
- Electronic Consumer Medication Information Leaflet (RiMUP) on NPRA website

- Internet (e.g Google)
- Leaflet from healthcare professionals (e.g. doctors, pharmacists, nurses)
- Others (please specify):\_\_

**7. Why did you choose the source that you selected in question 6? You may choose one or more options.**

- Trustworthy
- Easy to understand
- Readily accessible
- Recommended by others
- Other reasons (please specify):\_\_

**8. How often do you read the accompanying medicinal product package insert?**

- Always
- Sometimes
- Only when I receive a new medication
- Never

**9. Please state the reason why you never read the accompanying medicinal product package insert? **(SKIP TO SECTION B)****

**10. Why did you refer to the medicinal product package insert? You may choose one or more options.**

- Medication purpose and how it works
- Dosage or administration
- Side effects
- Safety in pregnancy and breastfeeding
- Drug interactions or precaution with other diseases
- Others (please specify): \_\_

**Section B: Awareness of benefits and perceived challenges with electronic medicinal product information (5 Point Likert Scale)**

Part I: The statements below are the potential benefits associated with electronic medicinal product information. For each statement, choose one answer that is applicable to you. ( 1= strongly disagree, 2= disagree, 3= neutral, 4= agree, 5= strongly agree).

| No | Statement                                                                                                                                             | Strongly disagree | Disagree | Neutral | Agree | Strongly agree |
|----|-------------------------------------------------------------------------------------------------------------------------------------------------------|-------------------|----------|---------|-------|----------------|
| B1 | Electronic Medicinal Product Information allows me to retrieve information anywhere, anytime, without fear of losing it.                              | 1                 | 2        | 3       | 4     | 5              |
| B2 | Electronic Medicinal Product Information allows me to understand my medication better with images and videos.                                         | 1                 | 2        | 3       | 4     | 5              |
| B3 | Electronic Medicinal Product Information allows me to understand the medication better by choosing my preferred language.                             | 1                 | 2        | 3       | 4     | 5              |
| B4 | Electronic Medicinal Product Information allows the use of advanced interactive features such as adjustable font size keyword search and audio texts. | 1                 | 2        | 3       | 4     | 5              |
| B5 | Electronic Medicinal Product Information allows me to get the most updated medication information.                                                    | 1                 | 2        | 3       | 4     | 5              |
| B6 | Electronic Medicinal Product Information uses paperless system to protect the environment.                                                            | 1                 | 2        | 3       | 4     | 5              |

Part II: The statements below are the potential challenges with electronic medicinal products information implementation. For each statement, choose one answer that is applicable to you.. (Scale 1-5; where 1= strongly disagree, 2= disagree, 3= neutral, 4= agree, 5= strongly agree).

| No  | Statement                                                                                                     | Strongly disagree | Disagree | Neutral | Agree | Strongly agree |
|-----|---------------------------------------------------------------------------------------------------------------|-------------------|----------|---------|-------|----------------|
| BA1 | I have no electronic gadgets to access electronic medicinal product information.                              | 1                 | 2        | 3       | 4     | 5              |
| BA2 | I have limited skill on the use of electronic gadgets to access electronic medicinal product information.     | 1                 | 2        | 3       | 4     | 5              |
| BA3 | I have limited internet access and might face difficulties in using electronic medicinal product information. | 1                 | 2        | 3       | 4     | 5              |
| BA4 | I have limited skills to browse electronic medicinal product information.                                     | 1                 | 2        | 3       | 4     | 5              |
| BA5 | I am concerned about obtaining potentially illegal electronic medicinal product information.                  | 1                 | 2        | 3       | 4     | 5              |

**Section C: Acceptance and preference towards transition to electronic medicinal product information (5 Point Likert Scale)**

The statements below are regarding the acceptance towards transition to electronic medicinal product information and preferences regarding its delivery. For each statement, circle one response that is applicable to you. ( 1= strongly disagree, 2= disagree, 3= neutral, 4= agree, 5= strongly agree).

| No | Statement                                                                                                                                                      | Strongly disagree | Disagree | Neutral | Agree | Strongly agree |
|----|----------------------------------------------------------------------------------------------------------------------------------------------------------------|-------------------|----------|---------|-------|----------------|
| C1 | I like the idea of substituting paper-based medicinal product package inserts with electronic medicinal product information in the near future.                | 1                 | 2        | 3       | 4     | 5              |
| C2 | I would prefer to access electronic medicinal product information through scanning a digital code (Example: QR code) printed on the outer medication package.  | 1                 | 2        | 3       | 4     | 5              |
| C3 | I would like to receive a link to the electronic medicinal product information sent through text message or an email.                                          | 1                 | 2        | 3       | 4     | 5              |
| C4 | I would like to access the electronic medicinal product information through official or government websites.                                                   | 1                 | 2        | 3       | 4     | 5              |
| C5 | I would like to access the electronic medicinal product information through a digital patient service linked to my medication list. (Example: Medication Apps) | 1                 | 2        | 3       | 4     | 5              |
| C6 | I would like the option to request a printed copy of the medicinal product package insert.                                                                     | 1                 | 2        | 3       | 4     | 5              |

C7. Do you have any other suggestions (e.g. support needs) towards the successful implementation of electronic medicinal product information?

- Yes, please elaborate: \_\_\_\_\_
- No
