# Supplementary material for: Acceptance of Electronic Labeling for Medicinal Product Information Among Malaysian Hospital Patients: Cross-Sectional Study
Source: PubMed Central journal article supplement (PMC11447418; doi:10.2196/56591), 2024-09-18
Supplement: jmir_v26i1e56591_app2.pdf [file jmir_v26i1e56591_app2.pdf]

## Multimedia Appendix 2

### Questionnaire: Acceptance to e-labelling among Hospital Ambulatory patients (Malay)

#### Bahagian A: Ciri-ciri demografik dan penggunaan risalah bungkusan produk.

1. Umur: \_\_

2. Jantina

- Lelaki
- Perempuan

3. Bangsa

- Melayu
- Cina
- India
- Lain-lain

4. Tahap pendidikan tertinggi

- Universiti/ Kolej
- Pendidikan menengah
- Pendidikan rendah
- Tidak bersekolah

5. Pernahkah anda memperoleh atau mencari maklumat bertulis berkaitan ubat-ubatan anda?

- Ya
- Tidak **(SKIP TO SECTION B)**

**6. Apakah sumber yang paling biasa anda gunakan untuk mencari maklumat bertulis tentang ubatan? Anda boleh memilih satu atau lebih jawapan.**

- Risalah bungkusan produk
- Risalah Maklumat Ubat Untuk Pengguna (RiMUP) elektronik di laman web Bahagian Regulatori Farmasi Negara (NPRA)
- Internet (Contoh: Google)
- Risalah dari Pakar kesihatan (Contoh: doktor, ahli farmasi, jururawat)
- Lain-lain (sila nyatakan): \_\_

**7. Mengapakah anda memilih sumber yang telah anda pilih di soalan 6? Anda boleh memilih satu atau lebih jawapan.**

- Boleh dipercayai
- Senang difahami
- Senang diakses/diperoleh
- Disyorkan oleh orang lain
- Sebab lain (sila nyatakan): \_\_\_\_

**8. Berapa kerapkah anda membaca risalah bungkusan produk yang disertakan?**

- Sentiasa
- Kadang-kala
- Hanya apabila saya menerima ubatan yang baru
- Tidak pernah (Sila nyatakan sebab): \_\_

**9. Nyatakan sebab anda tidak pernah membaca risalah produk ubat dalam bungkusan yang disertakan **(SKIP TO SECTION B)****

**10. Mengapakah anda merujuk kepada risalah bungkusan produk? Anda boleh memilih satu atau lebih jawapan.**

- Tujuan ubatan dan cara ia berfungsi
- Dos atau cara penggunaan

- Kesan sampingan
- Keselamatan semasa mengandung dan menyusu
- Interaksi ubat atau langkah berhati-hati dengan penyakit lain
- Lain-lain (sila nyatakan): \_\_

**Bahagian B: Kesedaran tentang kebaikan dan cabaran dihadapi dengan Maklumat Produk elektronik (ePI) (Skala Likert 5 Mata)**

Bahagian I: Kenyataan berikut adalah potensi faedah yang dikaitkan dengan ePI. Untuk setiap kenyataan, pilih satu jawapan yang berkenaan dengan anda. (1 = sangat tidak setuju, 2 = tidak setuju, 3 = neutral, 4 = setuju, 5 = sangat setuju).

| No | Statement                                                                                                                                              | Sangat tidak setuju | Tidak setuju | Neutral | Setuju | Sangat setuju |
|----|--------------------------------------------------------------------------------------------------------------------------------------------------------|---------------------|--------------|---------|--------|---------------|
| B1 | Maklumat Produk Elektronik membenarkan saya memperoleh maklumat di mana-mana, pada pada bila-bila masa, tanpa risau tentang kehilangannya.             | 1                   | 2            | 3       | 4      | 5             |
| B2 | Maklumat Produk Elektronik membenarkan saya memahami ubatan saya dengan lebih baik dengan menggunakan gambar dan video.                                | 1                   | 2            | 3       | 4      | 5             |
| B3 | Maklumat Produk Elektronik membenarkan saya lebih memahami tentang ubatan dengan memilih bahasa pilihan saya.                                          | 1                   | 2            | 3       | 4      | 5             |
| B4 | Maklumat Produk Elektronik membenarkan penggunaan ciri interaktif yang canggih seperti saiz huruf yang boleh diubah, carian kata kunci dan audio teks. | 1                   | 2            | 3       | 4      | 5             |
| B5 | Maklumat Produk Elektronik membenarkan saya memperoleh maklumat tentang ubatan yang paling terkini.                                                    | 1                   | 2            | 3       | 4      | 5             |
| B6 | Maklumat Produk Elektronik menggunakan sistem tanpa kertas untuk melindungi alam sekitar.                                                              | 1                   | 2            | 3       | 4      | 5             |

Bahagian II: Kenyataan berikut adalah cabaran yang mungkin dihadapi dengan pelaksanaan ePI. Bagi setiap kenyataan, pilih satu jawapan yang berkaitan dengan anda. (1 = sangat tidak setuju, 2 = tidak setuju, 3 = neutral, 4 = setuju, 5 = sangat setuju)

| No  | Statement                                                                                                                     | Sangat tidak setuju | Tidak setuju | Neutral | Setuju | Sangat setuju |
|-----|-------------------------------------------------------------------------------------------------------------------------------|---------------------|--------------|---------|--------|---------------|
| BA1 | Saya tidak mempunyai alat elektronik untuk mengakses Maklumat Produk elektronik.                                              | 1                   | 2            | 3       | 4      | 5             |
| BA2 | Saya mempunyai kemahiran yang terhad dalam penggunaan alat elektronik untuk mengakses Maklumat Produk elektronik.             | 1                   | 2            | 3       | 4      | 5             |
| BA3 | Saya mempunyai akses internet yang terhad dan mungkin akan menghadapi kesukaran untuk menggunakan Maklumat Produk elektronik. | 1                   | 2            | 3       | 4      | 5             |
| BA4 | Saya mempunyai kemahiran yang terhad untuk melayari Maklumat Produk elektronik.                                               | 1                   | 2            | 3       | 4      | 5             |
| BA5 | Saya tidak yakin tentang mendapatkan Maklumat Produk elektronik yang berpotensi menyalahi undang-undang.                      | 1                   | 2            | 3       | 4      | 5             |

**Bahagian C: Penerimaan dan kecenderungan terhadap peralihan kepada Maklumat Produk elektronik (ePI)(Skala Likert 5 Mata)**

Kenyataan berikut adalah tentang penerimaan terhadap peralihan kepada ePI dan kecenderungan kepada penyampaiannya. Bagi setiap kenyataan, sila pilih satu jawapan yang berkaitan dengan anda.

(1 = sangat tidak setuju, 2 = tidak setuju, 3 = neutral, 4 = setuju, 5 = sangat setuju)

| No | Statement                                                                                                                                             | Sangat tidak setuju | Tidak setuju | Neutral | Setuju | Sangat setuju |
|----|-------------------------------------------------------------------------------------------------------------------------------------------------------|---------------------|--------------|---------|--------|---------------|
| C1 | Saya suka idea menggantikan risalah bungkusan dalam bentuk kertas dengan Maklumat Produk elektronik pada masa akan dat                                | 1                   | 2            | 3       | 4      | 5             |
| C2 | Saya lebih suka untuk mengakses Maklumat Produk elektronik dengan mengimbas kod digital (Contoh: Kod QR) yang dicetak di luar bungkusan ubat.         | 1                   | 2            | 3       | 4      | 5             |
| C3 | Saya inginkan pautan untuk mengakses Maklumat Produk elektronik dihantar melalui mesej atau e-mel.                                                    | 1                   | 2            | 3       | 4      | 5             |
| C4 | Saya ingin mengakses Maklumat Produk elektronik melalui laman web rasmi atau laman web kerajaan..                                                     | 1                   | 2            | 3       | 4      | 5             |
| C5 | Saya ingin mengakses Maklumat Produk elektronik melalui perkhidmatan pesakit digital yang dikaitkan dengan senarai ubat saya. (Contoh: Aplikasi Ubat) | 1                   | 2            | 3       | 4      | 5             |
| C6 | Saya lebih suka jika diberi pilihan untuk meminta salinan bercetak risalah bungkusan.                                                                 | 1                   | 2            | 3       | 4      | 5             |

C7. Adakah anda mempunyai cadangan lain (contohnya: keperluan sokongan) terhadap kejayaan pelaksanaan Maklumat Produk elektronik?

- Ya, sila huraikan:\_\_\_\_\_
- Tidak
